# Supplementary material
Source: PubMed Central journal article supplement (PMC2537461)

# Total Synthesis of Bipinnatin J

Qinhua Huang and Viresh H. Rawal

*Department of Chemistry, The University of Chicago*

*5735 South Ellis Avenue, Chicago, IL 60637*

## SUPPORTING INFORMATION

### General

All reagents were commercially obtained (Aldrich, Acros) at the highest commercial quality and used without further purification. Air and moisture sensitive reagents were transferred via syringe or cannula. All moisture sensitive reactions were carried out in flame-dried glassware under an atmosphere of argon with freshly distilled solvents. The reactions were monitored by thin-layer chromatography carried out on 0.25mm Whatman silica gel plates using UV light as the visualizing agent. The NMR spectra were obtained on a Bruker DRX-400 (400 MHz) or a Bruker DRX-500 (500 MHz) spectrometer. The following abbreviations were used to explain the multiplicities: s = singlet; d = doublet, t = triplet, q = quartet, dd = doublet of doublets, m = multiplet, br = broad. Mass spectroscopic analyses were carried out at the facilities of The University of Chicago. IR spectra were recorded on a Nicolet Nexus 670 FT-IR and values are reported in  $\text{cm}^{-1}$  units.

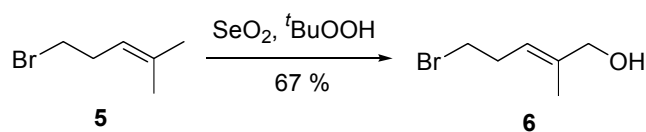

**(E)-5-Bromo-2-methylpent-2-en-1-ol (6).** Compound **6** was prepared by a modified literature procedure.<sup>1</sup> To a suspension of  $\text{SeO}_2$  (0.832 g, 7.5 mmol, 0.5 equiv) in dry  $\text{CH}_2\text{Cl}_2$  (20 mL) at  $0\text{ }^\circ\text{C}$  was added slowly anhydrous  $t\text{-BuOOH}$  (5.0-6.0 M in decane, 5.45 mL,  $\sim 30.0$  mmol, 2.0 equiv). The mixture was stirred at  $0\text{ }^\circ\text{C}$  for 5 min and the ice bath was removed. The resulting mixture was stirred at  $25\text{ }^\circ\text{C}$  for 30 min and was cooled to  $0\text{ }^\circ\text{C}$ . A solution of 5-bromo-2-methylpent-2-ene (2.45 g, 15.0 mmol) in dry  $\text{CH}_2\text{Cl}_2$  (15 mL) was added slowly. The resulting suspension was then stirred at  $25\text{ }^\circ\text{C}$  for 12 h. The mixture was diluted with  $\text{Et}_2\text{O}$  (100 mL) and filtered to remove solid

compounds. The filtrate was washed with 10 % aq KOH (100 mL) and brine (100 mL). The organic solvent was dried over MgSO<sub>4</sub>, filtered, and concentrated under reduced pressure. The residue was chromatographed on silica gel (hexane/EtOAc 4:1) to afford 1.79 g of the indicated compound in a 67 % yield as a yellow oil with spectra identical to that reported in the literature.<sup>1</sup>

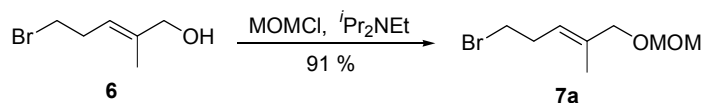

**(E)-5-Bromo-2-(methoxymethoxy)pent-2-ene (7a).** To a colorless solution of compound **6** (2.23 g, 12.45 mmol) in 20 mL dry CH<sub>2</sub>Cl<sub>2</sub> at 0 °C under N<sub>2</sub> atmosphere was added *i*Pr<sub>2</sub>NEt (2.38 mL, 13.69 mmol, 1.1 equiv) and MOMCl (1.41 mL, 18.67 mmol, 1.5 equiv). The resulting colorless mixture was then stirred at 25 °C for 3 h to reach completion. The reaction was diluted with Et<sub>2</sub>O (100 mL) and washed with brine (2 x 100 mL). The organic layer was dried over MgSO<sub>4</sub>, filtered, and the solvent was removed under reduced pressure. The yellow residue was chromatographed on silica gel (hexane/EtOAc 4:1) to afford 2.53 g of the indicated compound in a 91 % as a colorless oil: <sup>1</sup>H NMR (CDCl<sub>3</sub>, 500 Hz) δ 1.58 (s, 3H), 2.64 (td, *J* = 7.0, 7.5 Hz, 2H), 3.38 (t, *J* = 7.0 Hz, 2H), 3.38 (s, 3H), 3.95 (s, 2H), 4.63 (s, 2H), 5.46 (qt, *J* = 1.5, 7.5 Hz, 1H); <sup>13</sup>C NMR (CDCl<sub>3</sub>, 125 MHz) δ 14.2, 31.3, 32.4, 55.3, 72.6, 95.4, 124.3, 134.9; IR (neat, cm<sup>-1</sup>) 2986, 2931, 2883, 1461, 1440, 1151, 1049; MS calculated for C<sub>8</sub>H<sub>15</sub><sup>79</sup>BrO<sub>2</sub> (M<sup>+</sup> + H) 223.0, found 223.0.

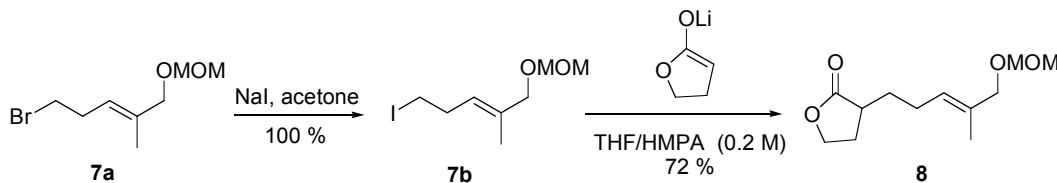

**(E)-3-(5-(Methoxymethoxy)-4-methylpent-3-enyl)dihydrofuran-2(3H)-one (8).** To NaI (2.21 g, 14.76 mmol, 3.0 equiv) in a 6 dram vial was added a solution of compound **7a** (1.10 g, 4.92 mmol) in dry acetone (10 mL). The resulting mixture was stirred at 25 °C in the dark for 12 h to reach completion. The reaction was diluted with Et<sub>2</sub>O (100 mL) and washed with brine (100 mL). The organic layer was dried over

MgSO<sub>4</sub> and filtered. The solvent was removed under reduced pressure to afford 100 % yield of compound **7b**, which was used without further purification in next step. Compound **7b**: <sup>1</sup>H NMR (CDCl<sub>3</sub>, 400 MHz) δ 1.67 (s, 3H), 2.65 (td, *J* = 7.2, 7.6 Hz, 2H), 3.15 (t, *J* = 7.2 Hz, 2H), 3.38 (s, 3H), 3.94 (s, 2H), 4.64 (s, 2H), 5.41 (qt, *J* = 1.2, 7.6 Hz, 1H). To a solution of freshly prepared LDA (5.90 mmol, 1.2 equiv) in 15 mL THF at -78 °C under N<sub>2</sub> atmosphere was added γ-butyrolactone (0.473 mL, 6.15 mmol, 1.25 equiv). The resulting colorless solution was stirred at -78 °C for 15 min and HMPA (3.0 mL) was added slowly. Stirred at -78 °C for another 10 min and a solution of compound **7b** (4.92 mmol) in a mixed solvent of THF (5 mL) and HMPA (1.0 mL) was added through cannula. The resulting pale yellow solution was stirred at -78 °C for 1.5 h to reach completion. The reaction was diluted with Et<sub>2</sub>O (100 mL) and washed with brine (100 mL). The organic solvent was dried over MgSO<sub>4</sub>, filtered, and concentrated under reduced pressure. The residue was chromatographed on silica gel (hexane/EtOAc 1:1) to afford 0.802 g of the indicated compound in a 72 % yield as a pale yellow oil: <sup>1</sup>H NMR (CDCl<sub>3</sub>, 500 Hz) δ 1.49-1.56 (m, 1H), 1.67 (s, 3H), 1.91-2.00 (m, 2H), 2.13-2.24 (m, 2H), 2.36-2.42 (m, 1H), 2.49-2.54 (m, 1H), 3.37 (s, 3H), 3.93 (s, 2H), 4.18 (ddd, *J* = 6.5, 9.0, 9.5 Hz, 1H), 4.34 (ddd, *J* = 3.0, 8.5, 9.0 Hz, 1H), 4.61 (s, 2H), 5.43 (qt, *J* = 1.0, 7.0 Hz, 1H); <sup>13</sup>C NMR (CDCl<sub>3</sub>, 125 MHz) δ 14.1, 25.3, 28.7, 30.1, 38.6, 55.2, 66.4, 73.1, 95.4, 126.5, 133.2, 179.3; IR (neat, cm<sup>-1</sup>) 2979, 2928, 1769; MS calculated for C<sub>10</sub>H<sub>15</sub>O<sub>2</sub> (M<sup>+</sup> - MOM) 167.1, found 167.1.

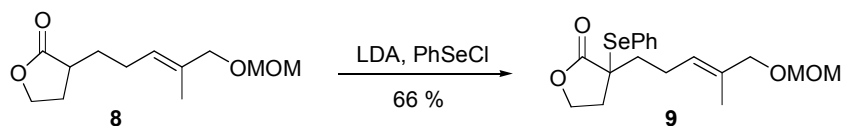

**(E)-3-(5-(Methoxymethoxy)-4-methylpent-3-enyl)-3-**

**(phenylselanyl)dihydrofuran-2(3H)-one (9).** To a solution of freshly prepared LDA (5.81 mmol, 1.1 equiv) in 10 mL THF at -78 °C under N<sub>2</sub> atmosphere was added a solution of compound **8** (1.21 g, 5.28 mmol) in THF (8.0 mL). The resulting pale yellow solution was stirred at -78 °C for 30 min and HMPA (3.0 mL) was added slowly. After 5 min, a solution of PhSeCl (1.31 g, 6.86 mmol, 1.3 equiv) in THF (3.0 mL) was added into the reaction mixture. The reaction was stirred at -78 °C for 30 min to reach completion. The reaction was diluted with Et<sub>2</sub>O (100 mL) and washed with brine (100 mL). The

organic layer was dried over MgSO<sub>4</sub>, filtered, concentrated under reduced pressure. The residue was chromatographed on silica gel (hexane/EtOAc 1:1) to afford 1.34 g of the indicated compound in a 66 % yield as a yellow oil: <sup>1</sup>H NMR (CDCl<sub>3</sub>, 500 Hz) δ 1.67 (s, 3H), 1.76 (ddd, *J* = 5.0, 11.0, 14.5, Hz, 1H), 1.93 (ddd, *J* = 5.0, 11.5, 14.0 Hz, 1H), 2.05-2.12 (m, 1H), 2.24 (ddd, *J* = 1.0, 6.0, 14.0 Hz, 1H), 2.36-2.46 (m, 2H), 3.36 (s, 3H), 3.91 (s, 2H), 4.22 (ddd, *J* = 6.0, 9.0, 10.5 Hz, 1H), 4.27 (ddd, *J* = 1.5, 9.0, 9.0 Hz, 1H), 4.61 (s, 2H), 5.39 (qt, *J* = 1.0, 7.5 Hz, 1H), 7.33 (dd, *J* = 7.0, 7.5 Hz, 2H), 7.42 (dt, *J* = 1.5, 7.5 Hz, 1H), 7.63 (dd, *J* = 7.0, 7.5 Hz, 2H); <sup>13</sup>C NMR (CDCl<sub>3</sub>, 125 MHz) δ 14.1, 23.9, 34.6, 35.0, 48.9, 55.2, 65.0, 72.9, 95.4, 125.5, 126.3, 129.1, 129.9, 133.0, 137.8, 176.6; IR (neat, cm<sup>-1</sup>) 3057, 2930, 1763; MS calculated for C<sub>16</sub>H<sub>19</sub>O<sub>2</sub>Se (M<sup>+</sup> - MOM) 323.0, found 323.0.

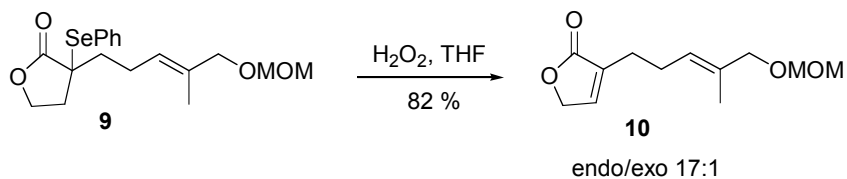

**(E)-3-(5-(Methoxymethoxy)-4-methylpent-3-enyl)furan-2(5H)-one (10).** To a yellow solution of compound **9** (1.30 g, 3.39 mmol) in 8 mL THF at 0 °C under N<sub>2</sub> atmosphere was added dropwise 30 % w/w aq. H<sub>2</sub>O<sub>2</sub> (0.69 mL, 6.78 mmol, 2.0 equiv). The resulting yellow solution was stirred at 0 °C for 3 min. Removed the ice-water bath and the yellow solution was stirred at 25 °C for 2 min. The yellow color disappeared and a colorless solution was obtained. The reaction was stirred at 25 °C for another 10 min, diluted with Et<sub>2</sub>O (100 mL), and washed with saturated aq NaHCO<sub>3</sub> (50 mL) and brine (50 mL). The organic layer was dried over MgSO<sub>4</sub>, filtered, and concentrated under reduced pressure. The residue was chromatographed on silica gel (hexane/EtOAc 1:1) to afford 0.629 g of the indicated compound (endo/exo 17:1) in an 82 % yield as a colorless oil: <sup>1</sup>H NMR (CDCl<sub>3</sub>, 500 Hz) δ 1.66 (s, 3H), 2.30-2.40 (m, 4H), 3.36 (s, 3H), 3.92 (s, 2H), 4.60 (s, 2H), 4.76 (d, *J* = 1.5 Hz, 1H), 4.76 (d, *J* = 2.0 Hz, 1H), 5.42 (qt, *J* = 1.0, 7.0 Hz, 1H), 7.11 (dd, *J* = 1.5, 2.0 Hz, 1H); <sup>13</sup>C NMR (CDCl<sub>3</sub>, 125 MHz) δ 14.1, 25.1, 25.4, 55.2, 70.1, 72.9, 95.3, 126.3, 133.3, 133.7, 144.5, 174.2; IR (neat, cm<sup>-1</sup>) 2932, 2886, 2823, 1751, 1450, 1051; MS calculated for C<sub>10</sub>H<sub>13</sub>O<sub>2</sub> (M<sup>+</sup> - MOM) 165.1, found 165.1.

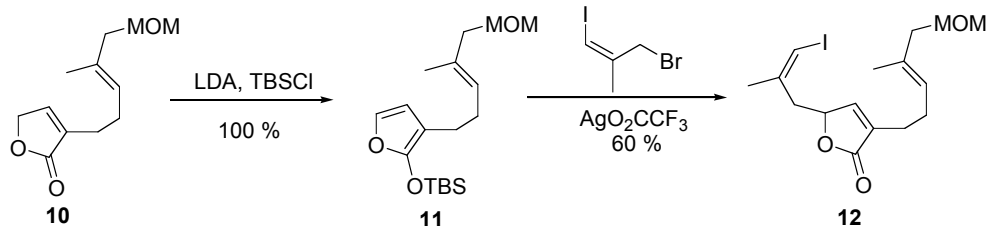

**5-((Z)-3-Iodo-2-methylallyl)-3-((E)-6-methoxy-4-methylhex-3-enyl)furan-2(5H)-one (12).** To a solution of freshly prepared LDA (2.81 mmol, 1.2 equiv) in THF (8.0 mL) at -78 °C under N<sub>2</sub> atmosphere was added a solution of compound **10** (0.530 g, 2.34 mmol) in THF (2.0 mL). The resulting pale yellow solution was stirred at -78 °C for 30 min and HMPA (3.0 mL) was added slowly. The reaction mixture was stirred at -78 °C for another 20 min and a solution of TBSCl (0.367 g, 2.43 mmol, 1.1 equiv) in THF (2.0 mL) was added dropwise. The reaction was then stirred at -78 °C for 20 min to reach completion. The reaction mixture was diluted with Et<sub>2</sub>O (100 mL), and washed with 5 % aq NaCl (50 mL) and brine (50 mL). The organic layer was collected, dried over MgSO<sub>4</sub>, and filtered. The solvent was removed under reduced pressure to afford compound **11** quantitatively, which was used in next step without further purification.

A solution of compound **11** (2.34 mmol) and 3-bromo-1-iodo-2-methylpropene<sup>2</sup> (0.79 g, 3.04 mmol, 1.3 equiv) in CH<sub>2</sub>Cl<sub>2</sub> (10 mL) was added into a suspension of AgO<sub>2</sub>CCF<sub>3</sub> (0.62 g, 2.81 mmol, 1.2 equiv) in CH<sub>2</sub>Cl<sub>2</sub> (10 mL) at -40 °C. The resulting deep blue reaction mixture was stirred at -40 °C for 1 h and warmed slowly to 25 °C (approx. 3 h). The reaction was then diluted with Et<sub>2</sub>O (100 mL) and filtered through Celite to remove silver salts. The filtrate was concentrated under reduced pressure. The residue was chromatographed on silica gel (hexane/EtOAc 2:1 and hexane/EtOAc 1:1) to afford 570 mg of the indicated compound in a 60 % yield as a yellow oil: <sup>1</sup>H NMR (CDCl<sub>3</sub>, 500 Hz) δ 1.67 (s, 3H), 1.99 (d, *J* = 1.5 Hz, 3H), 2.30-2.40 (m, 4H), 2.54 (dd, *J* = 7.5, 13.5 Hz, 1H), 2.66 (dd, *J* = 6.0, 13.5 Hz, 1H), 3.37 (s, 3H), 3.92 (s, 2H), 4.61 (s, 2H), 5.05 (dd, *J* = 6.0, 7.5 Hz, 1H), 5.43 (dd, *J* = 5.5, 7.0 Hz, 1H), 6.12 (d, *J* = 1.0 Hz, 1H), 7.10 (d, *J* = 1.0 Hz, 1H); <sup>13</sup>C NMR (CDCl<sub>3</sub>, 125 MHz) δ 14.1, 24.8, 25.0, 25.4, 42.4, 55.2, 73.0, 78.5, 79.4, 95.3, 126.3, 133.3, 134.0, 142.4, 147.7, 173.3; IR (neat, cm<sup>-1</sup>) 3063, 2924, 2822, 1758, 1438, 1051; MS calculated for C<sub>14</sub>H<sub>18</sub>IO<sub>2</sub> (M<sup>+</sup> - MOM) 345.0, found 345.0.

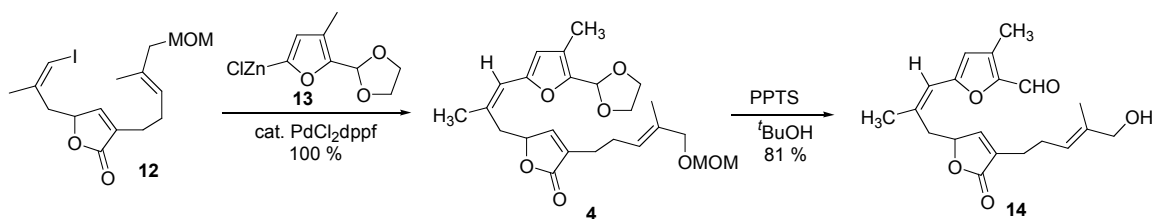

**5-((*Z*)-3-(4-((*E*)-5-hydroxy-4-methylpent-3-enyl)-5-oxo-2,5-dihydrofuran-2-yl)-2-methylprop-1-enyl)-3-methylfuran-2-carbaldehyde (14).** To a solution of dioxolane protected 3-methyl-2-furaldehyde<sup>3</sup> (0.484 g, 3.14 mmol, 3.3 equiv) in THF (8.0 mL) at -78 °C under N<sub>2</sub> atmosphere was added slowly a solution of <sup>t</sup>BuLi (1.7 M in pentane, 1.68 mL, 2.86 mmol, 3.0 equiv). The resulting brown solution was stirred at -78 °C for 15 min and a solution of ZnCl<sub>2</sub> (flame dry, 0.467 g, 3.42 mmol, 3.6 equiv) in THF (2.0 mL) was added dropwise. The resulting yellow clear solution was stirred at -78 °C for 30 min to generate the corresponding organozinc compound (approx. 2.86 mmol). The freshly prepared organozinc compound was added through cannula into a suspension of PdCl<sub>2</sub>dppf (38.8 mg, 0.047 mmol, 0.05 equiv) and compound **12** (387 mg, 0.952 mmol) in THF (3.0 mL) at 0 °C. The resulting mixture was then stirred at 25 °C for 1 h to reach completion. The reaction was diluted with Et<sub>2</sub>O (100 mL) and washed with brine (2 x 50 mL). The organic layer was collected, dried over MgSO<sub>4</sub>, filtered, and concentrated under reduced pressure. The residue was purified on a short column (silica gel, hexane/EtOAc 2:1) to afford compound **4** in a quantitative yield. Compound **4** is not very stable on the silica gel and solvents and was used in the next step right away.

To a solution of compound **4** (0.378 g, 0.873 mmol) in <sup>t</sup>BuOH (30 mL) was added PPTS (1.32 g, 5.24 mmol, 6.0 equiv). The resulting colorless mixture was stirred at 25 °C for 10 min and was then refluxing under N<sub>2</sub> atmosphere in a 90 °C oil bath. After 8 h, the reaction was cooled to 25 °C, diluted with Et<sub>2</sub>O (100 mL), and washed with brine (2 x 150 mL). The organic layer was collected, dried over MgSO<sub>4</sub>, filtered, and concentrated under reduced pressure. The residue was chromatographed on silica gel (hexane/EtOAc 1:2) to afford 240 mg of the indicated compound in an 81 % yield as a yellow oil: <sup>1</sup>H NMR (CDCl<sub>3</sub>, 400 Hz) δ 1.65 (s, 3H), 2.05 (d, *J* = 1.2 Hz, 3H), 2.13 (br s, 1H), 2.26-2.45 (m, 5H), 2.34 (s, 3H), 3.23 (d, *J* = 11.6 Hz, 1H), 3.99 (s, 2H), 5.11 (ddd, *J* = 1.6, 3.2, 8.4 Hz, 1H), 5.40 (qt, *J* = 1.2, 6.8 Hz, 1H), 6.17 (s, 1H), 6.18 (s, 1H), 7.33 (br s, 1H), 9.60 (s, 1H); <sup>13</sup>C NMR (CDCl<sub>3</sub>, 125 MHz) δ 10.0, 13.7, 24.8, 25.3, 26.7, 38.3, 68.5, 81.6, 113.9,

115.3, 123.8, 133.4, 136.5 (br), 136.5, 141.9 (br), 175.6 (br), 147.4, 149.1, 157.0, 173.8; IR (neat,  $\text{cm}^{-1}$ ) 3462 (br), 2922, 2856, 1751, 1662, 1499; MS calculated for  $\text{C}_{20}\text{H}_{23}\text{O}_4$  ( $\text{M}^+$  - OH) 327.2, found 327.1.

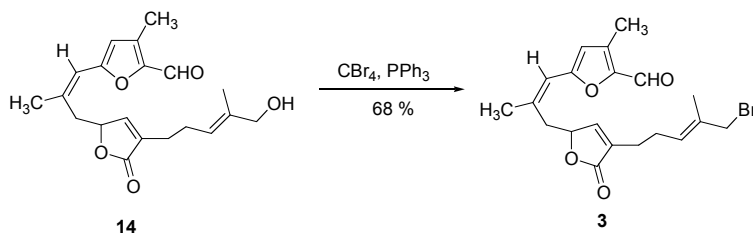

**5-((Z)-3-(4-((E)-5-Bromo-4-methylpent-3-enyl)-5-oxo-2,5-dihydrofuran-2-yl)-2-methylprop-1-enyl)-3-methylfuran-2-carbaldehyde (3).** To a yellow solution of compound **14** (230 mg, 0.667 mmol) in dry  $\text{CH}_2\text{Cl}_2$  (20 mL) at 0 °C was added  $\text{CBr}_4$  (0.228 g, 0.867 mmol, 1.3 equiv). The resulting mixture was stirred at 0 °C under  $\text{N}_2$  atmosphere until  $\text{CBr}_4$  was completely dissolved (approx. 3 min). Then  $\text{PPh}_3$  (0.262 g, 1.00 mmol, 1.5 equiv) was added portionwise at 0 °C. After 5 min, the reaction was diluted with  $\text{Et}_2\text{O}$  (100 mL) and washed with brine (50 mL). The organic layer was collected, dried over  $\text{MgSO}_4$ , filtered, and concentrated under reduced pressure at 25 °C. The residue was chromatographed on silica gel (hexane/ $\text{EtOAc}$  2:1) to afford 185 mg of the indicated compound in a 68 % yield as a colorless oil:  $^1\text{H}$  NMR ( $\text{CDCl}_3$ , 500 Hz)  $\delta$  1.74 (s, 3H), 2.04 (d,  $J = 1.0$  Hz, 3H), 2.29 (t,  $J = 7.0$  Hz, 2H), 2.35 (s, 3H), 2.35-2.38 (m, 2H), 2.54 (dd,  $J = 8.0, 13.5$  Hz, 1H), 3.18 (dd,  $J = 3.0, 13.5$  Hz, 1H), 3.94 (s, 2H), 5.12-5.14 (m, 1H), 5.55 (t,  $J = 7.0$  Hz, 1H), 6.18 (s, 1H), 6.18 (s, 1H), 7.26 (br s, 1H), 9.65 (s, 1H);  $^{13}\text{C}$  NMR ( $\text{CDCl}_3$ , 125 MHz)  $\delta$  10.0, 14.6, 24.4, 25.8, 26.5, 38.0, 41.1, 81.0, 113.9, 115.6, 129.2, 132.9, 133.3, 135.7 (br), 140.9 (br), 147.3, 148.9, 156.5, 173.3, 175.5 (br); IR (neat,  $\text{cm}^{-1}$ ) 2919, 2849, 1755, 1665, 1499; MS calculated for  $\text{C}_{20}\text{H}_{23}^{81}\text{BrO}_4$  ( $\text{M}^+ + \text{H}$ ) 409.1, found 409.1.





14.2, 14.2 Hz, 1H), 2.72 (dd,  $J = 4.5, 11.8$  Hz, 1H), 3.00 (dd,  $J = 11.8, 11.8$  Hz, 1H), 4.84 (s, 1H), 4.96 (s, 1H), 5.01-5.05 (m, 1H), 5.13 (dd,  $J = 1.2, 1.3$  Hz, 1H), 6.01 (s, 1H), 6.08 (s, 1H), 7.03 (dd,  $J = 1.4, 1.4$  Hz, 1H);  $^{13}\text{C}$  NMR ( $\text{CDCl}_3$ , 125 MHz)  $\delta$  10.2, 19.9, 23.9, 25.5, 27.9, 39.9, 48.2, 70.4, 78.6, 112.4, 115.5, 117.5, 119.5, 128.0, 133.0, 143.9, 148.6, 149.6, 152.2, 174.6. The stereochemistry of compound **16** was determined by  $J_{\text{H}^1\text{-H}^2} = 11.2$  Hz (*trans*). Compound **16**:  $^1\text{H}$  NMR ( $\text{CDCl}_3$ , 400 Hz)  $\delta$  1.11 (dd,  $J = 13.4, 13.4$  Hz, 1H), 1.57-1.64 (m, 1H), 1.78 (br s, OH, 1H), 1.84 (s, 3H), 1.97 (d,  $J = 1.2$  Hz, 3H), 1.99 (s, 3H), 2.08 (ddd,  $J = 1.8, 13.4, 13.4$  Hz, 1H), 2.34-2.41 (m, 2H), 2.72 (dd,  $J = 10.1, 10.2$  Hz, 1H), 3.66 (br dd,  $J = 10.3, 10.4$  Hz, 1H), 4.46 (d,  $J = 11.2$  Hz, 1H), 5.01 (s, 1H), 5.08-5.11 (m, 2H), 5.93 (s, 1H), 6.05 (d,  $J = 1.2$  Hz, 1H), 7.16 (s, 1H).

## References

- (1) Andresen, G.; Eriksen, A.; Dalhus, A. B.; Gundersen, L.-L.; Rise, F. *J. Chem. Soc., Perkin Trans. 1* **2001**, 1662-1672.
- (2) Larock, R. C.; Han, X. *J. Org. Chem.* **1999**, *64*, 1875-1887.
- (3) Klein, L. L. *J. Org. Chem.* **1985**, *50*, 1770-1773.
- (4) Rodríguez, A. D.; Shi, J.-G. *J. Org. Chem.* **1998**, *63*, 420-421.
- (5) (a) Wright, A. E.; Burres, N. S.; Schulte, G. K. *Tetrahedron Lett.* **1989**, *30*, 3491-3494; (b) Rodríguez, A. D.; Shi, J.-G. *J. Org. Chem.* **1998**, *63*, 420-421; (c) Rodríguez, A. D.; Shi, J.-G.; Huang, S. D. *J. Nat. Prod.* **1999**, *62*, 1228-1237; (d) Rodríguez, A. D.; Shi, Y.-P. *J. Nat. Prod.* **2000**, *63*, 1548-1550.

data/nmr500-1/293K/CDCl3/qh231-1 1 1 /w qhuang

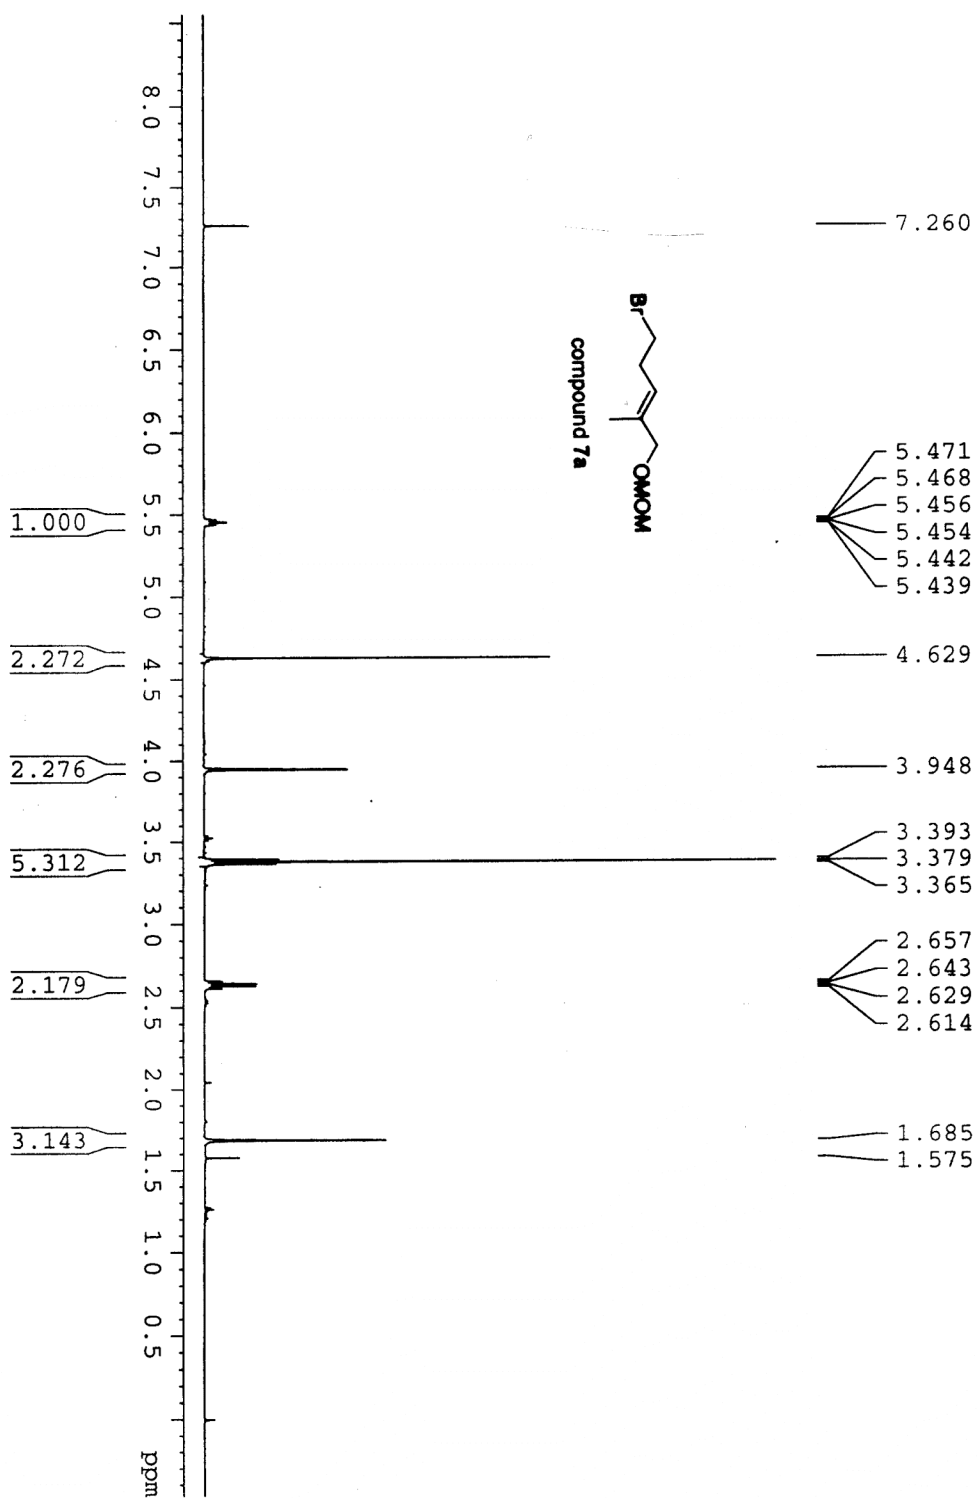

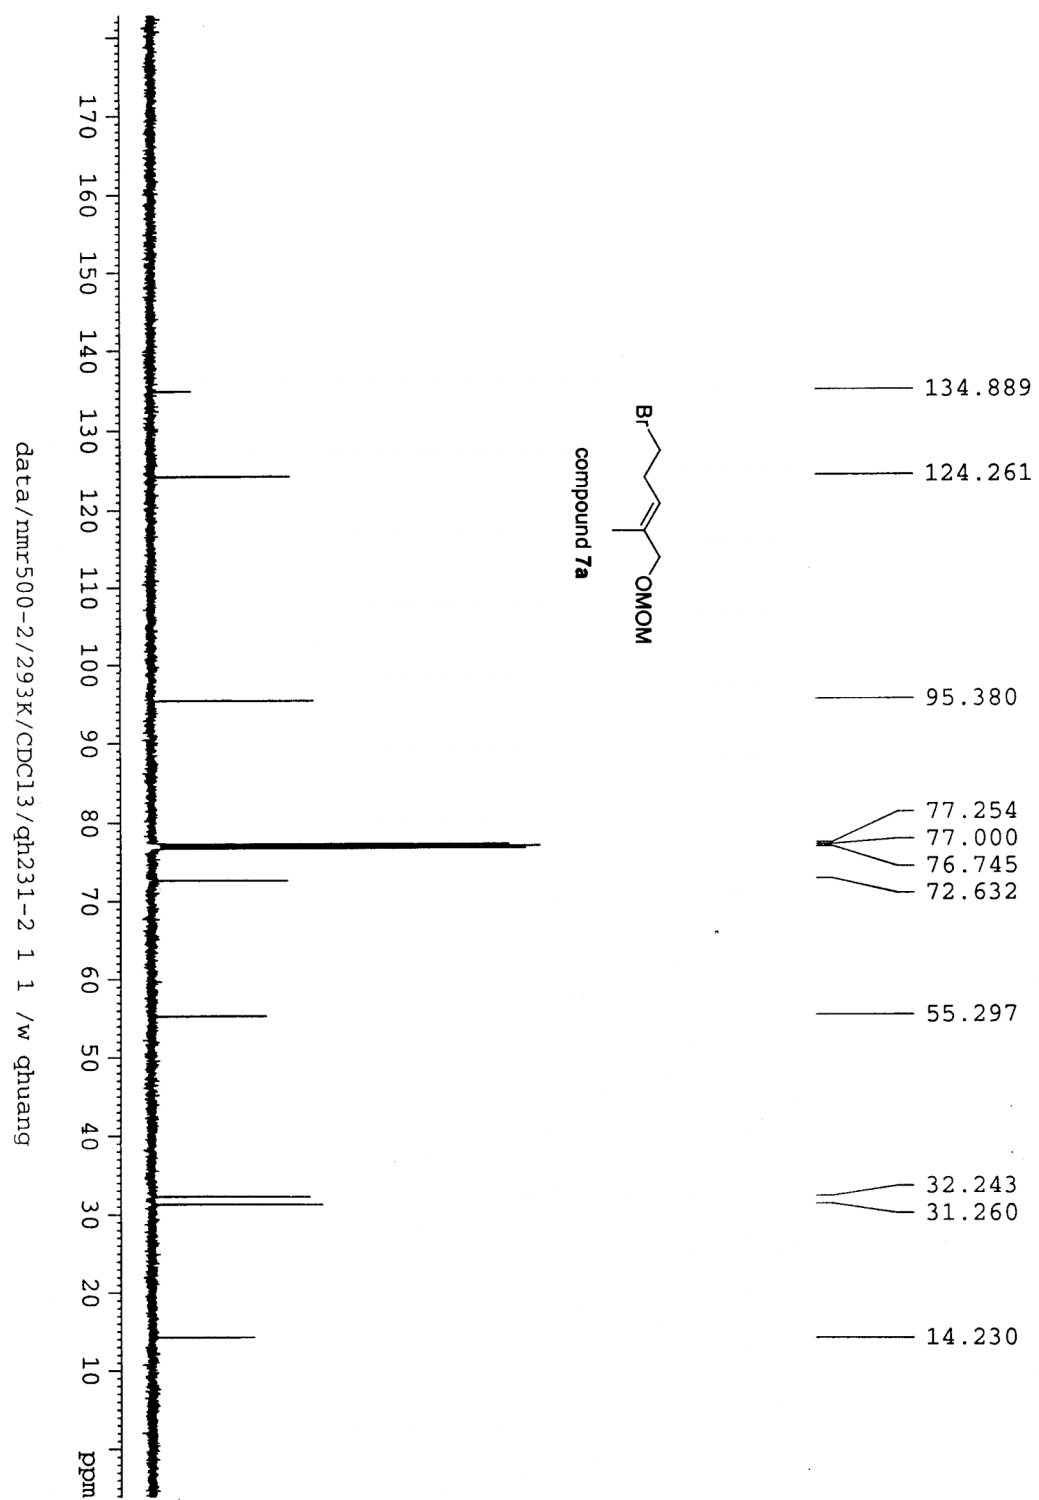

data/nmr500-1/293K/CDCl3/qh232-2 1 1 /w qhuang

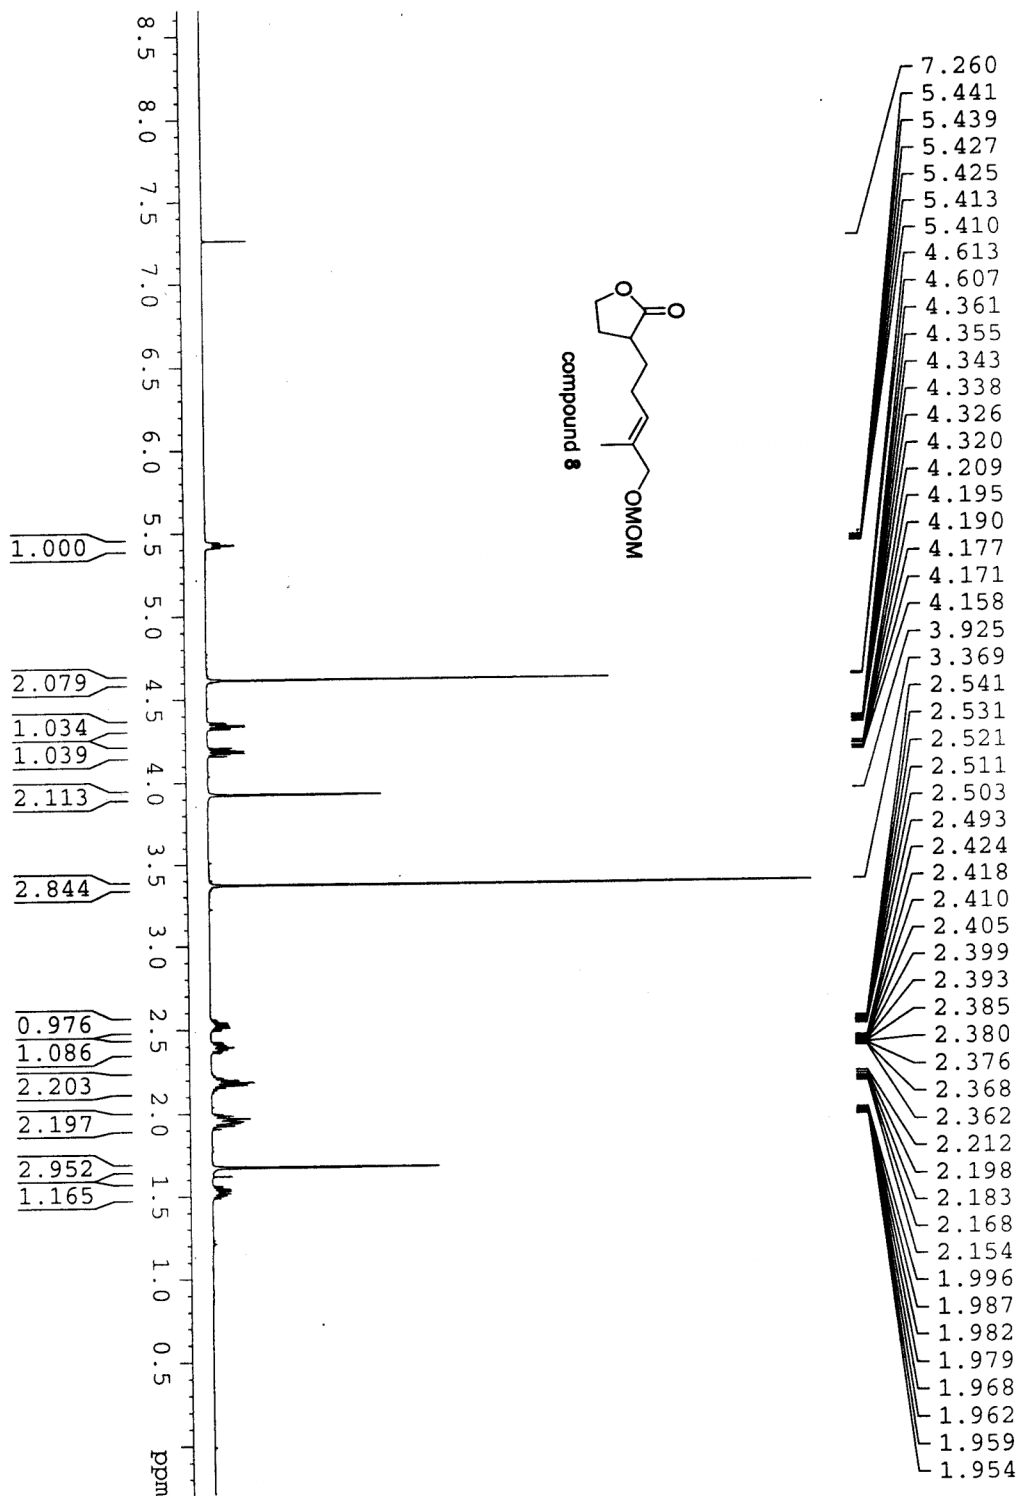

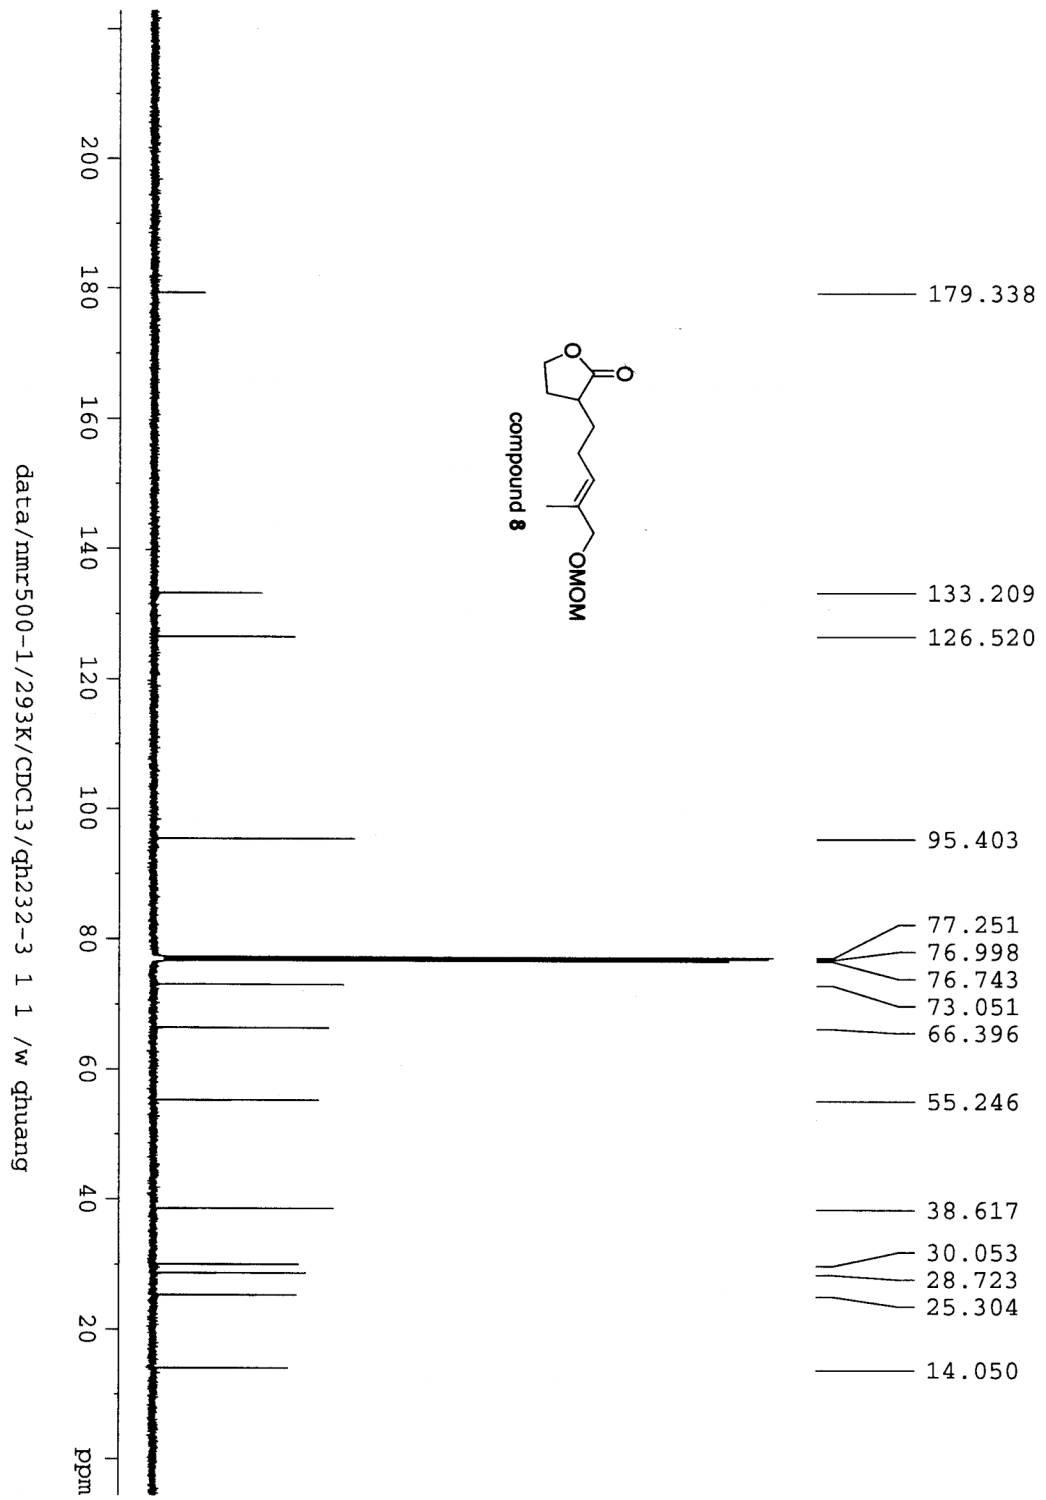

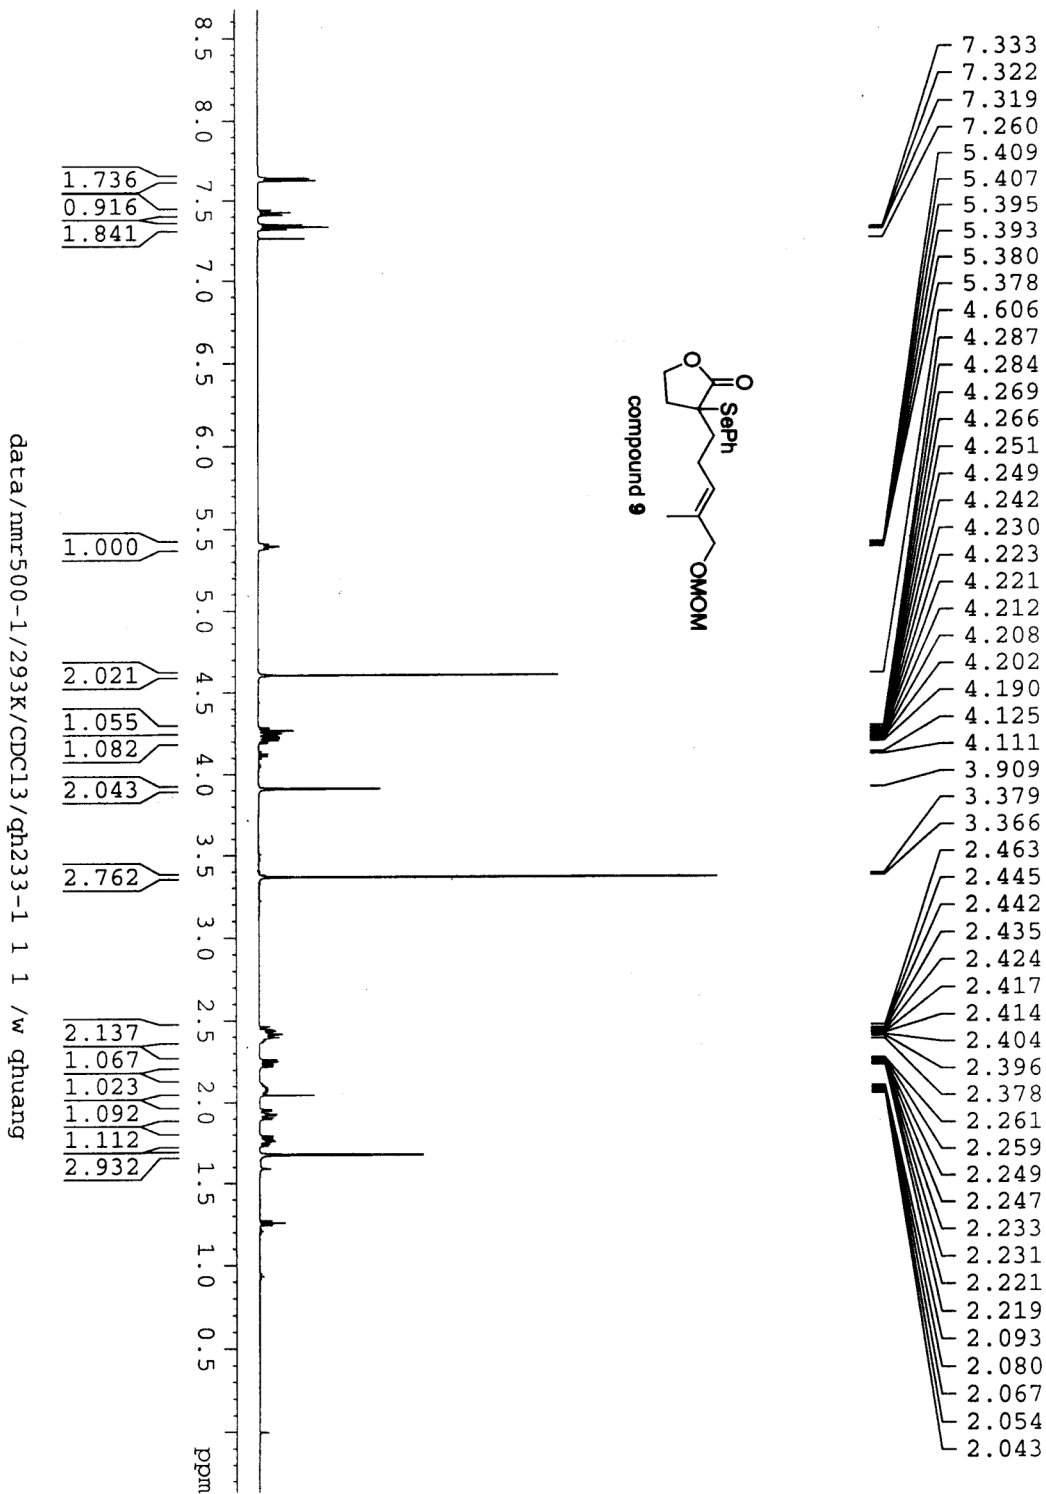

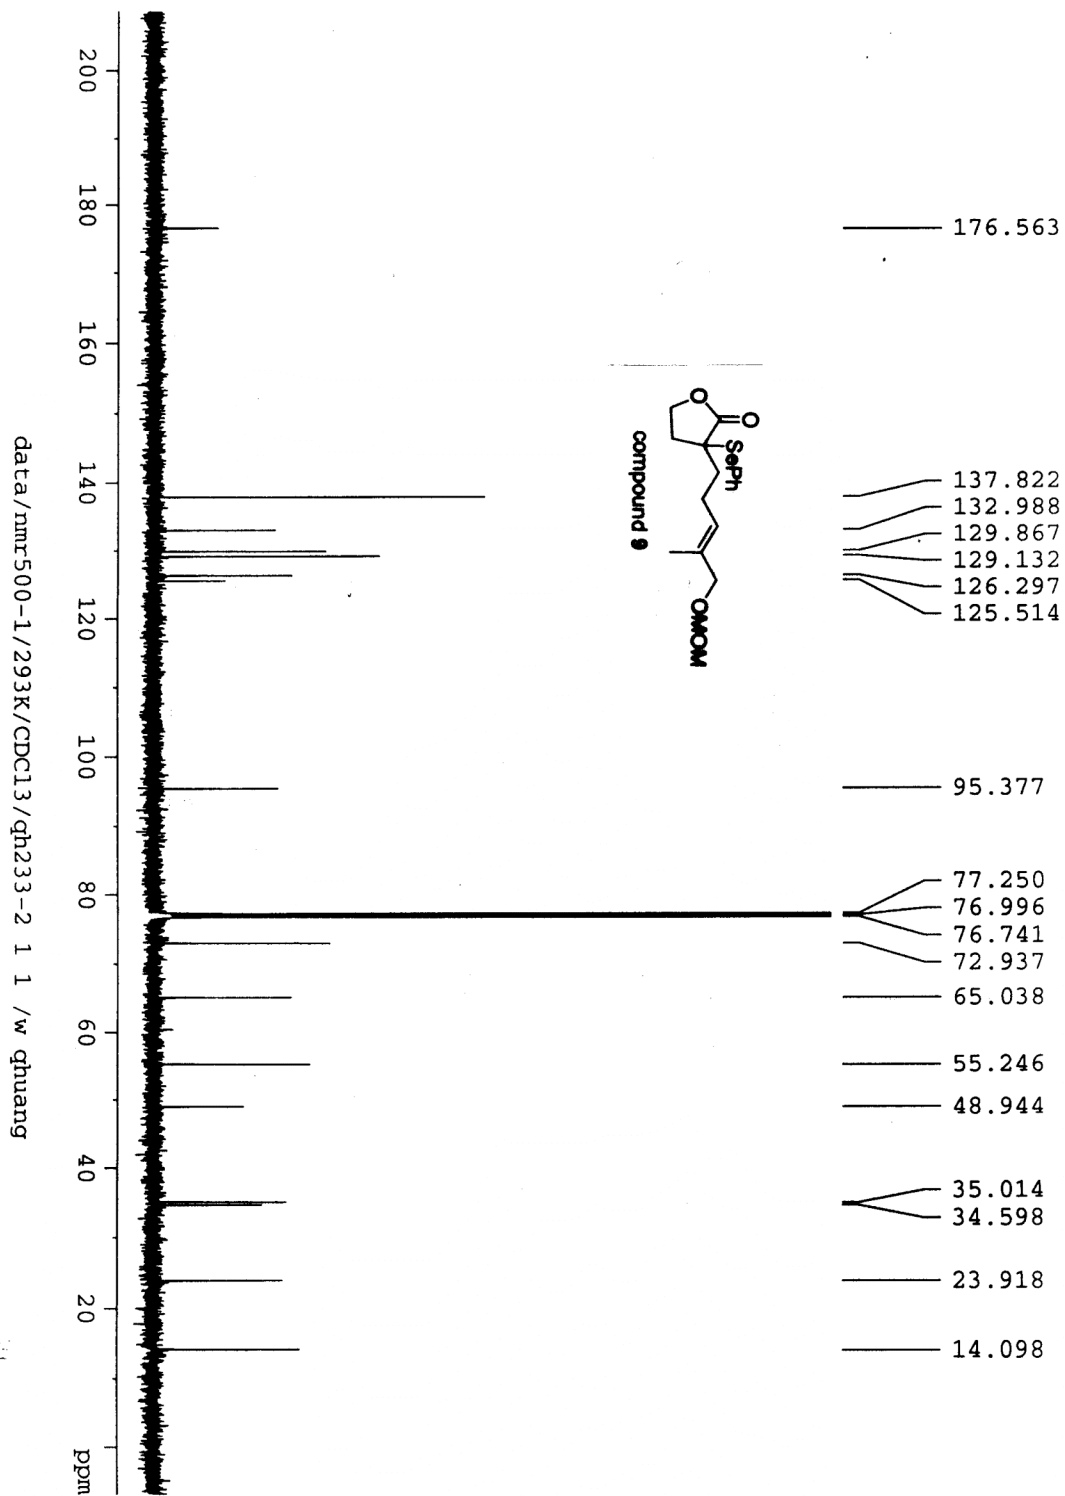

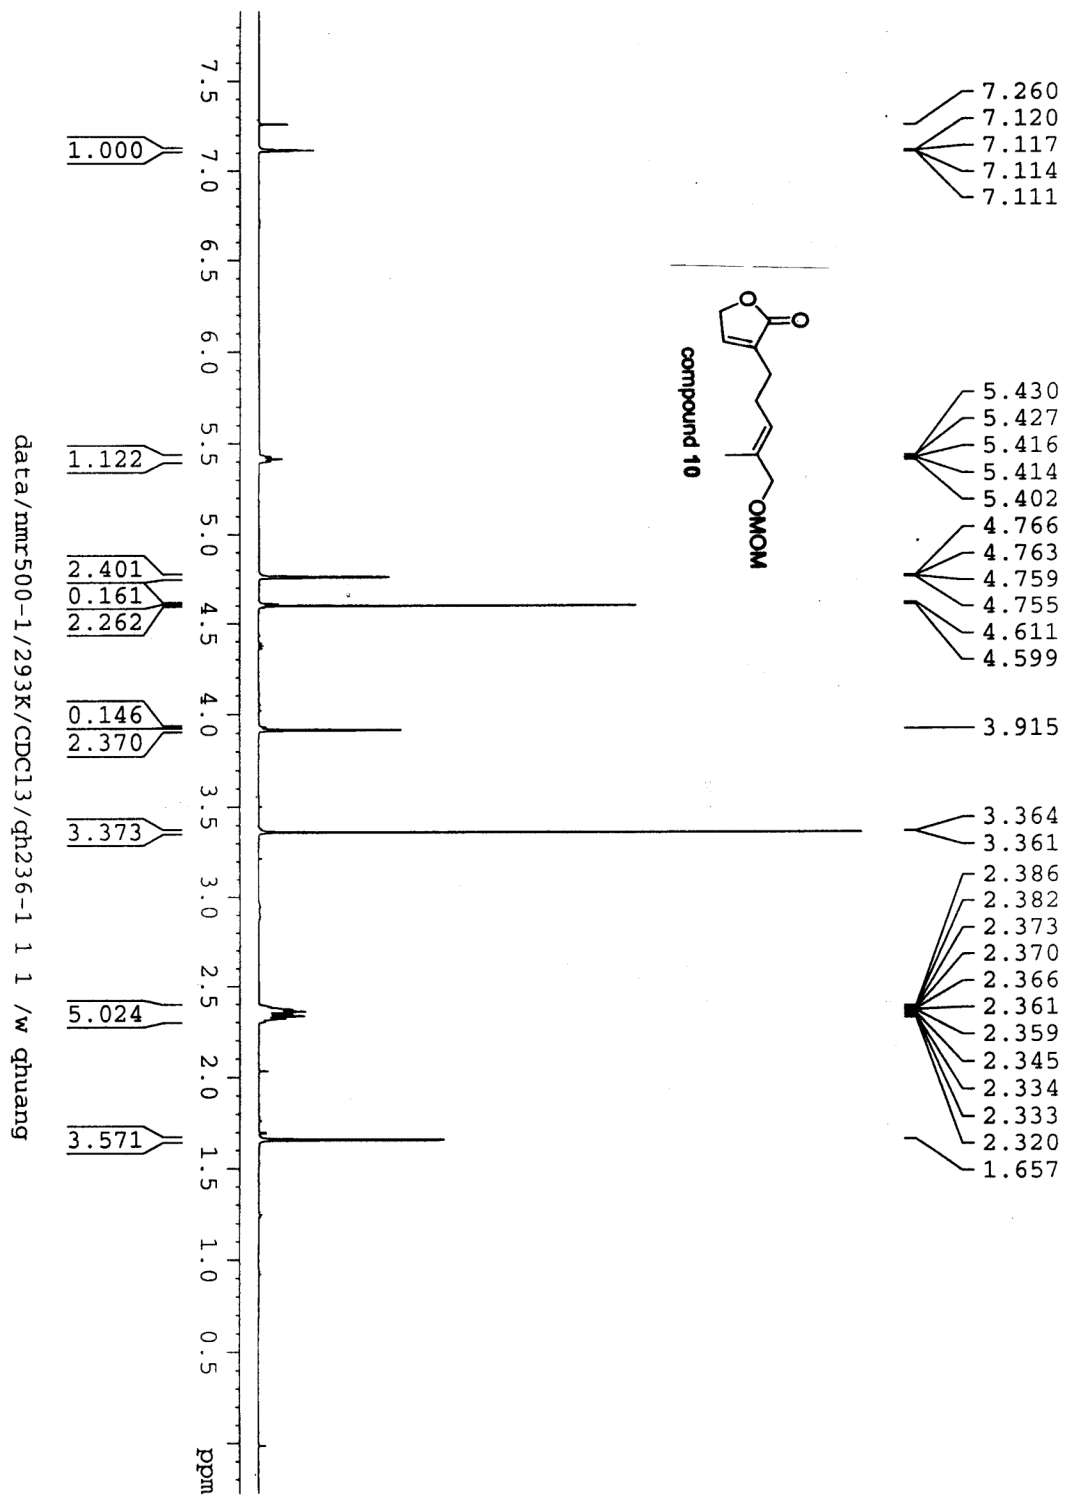



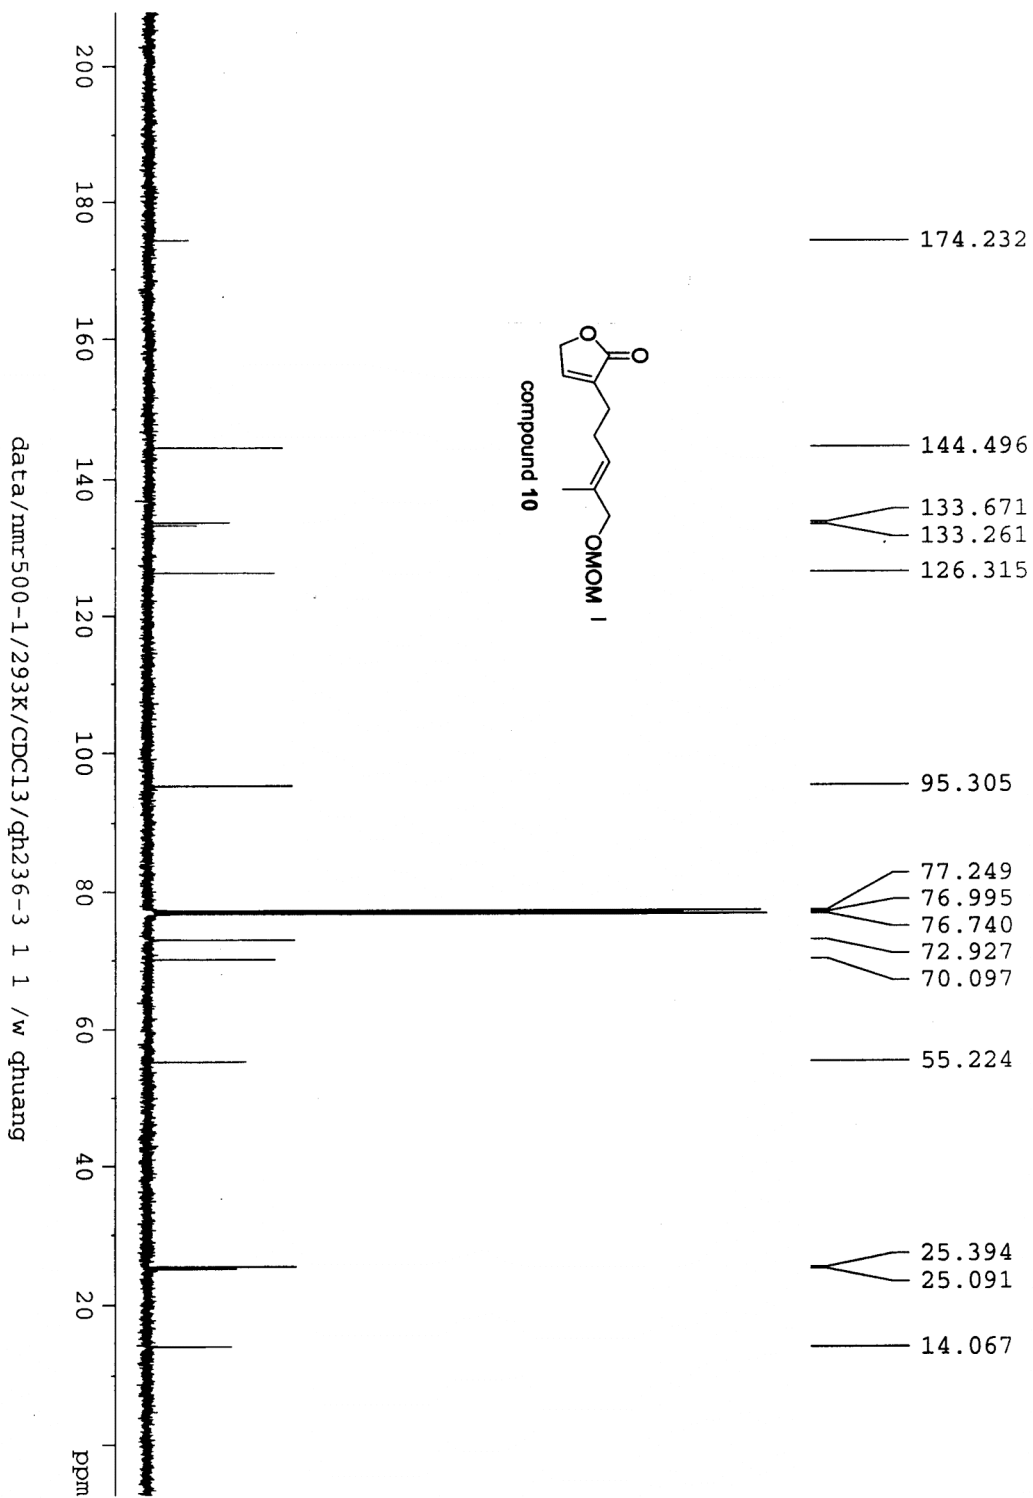

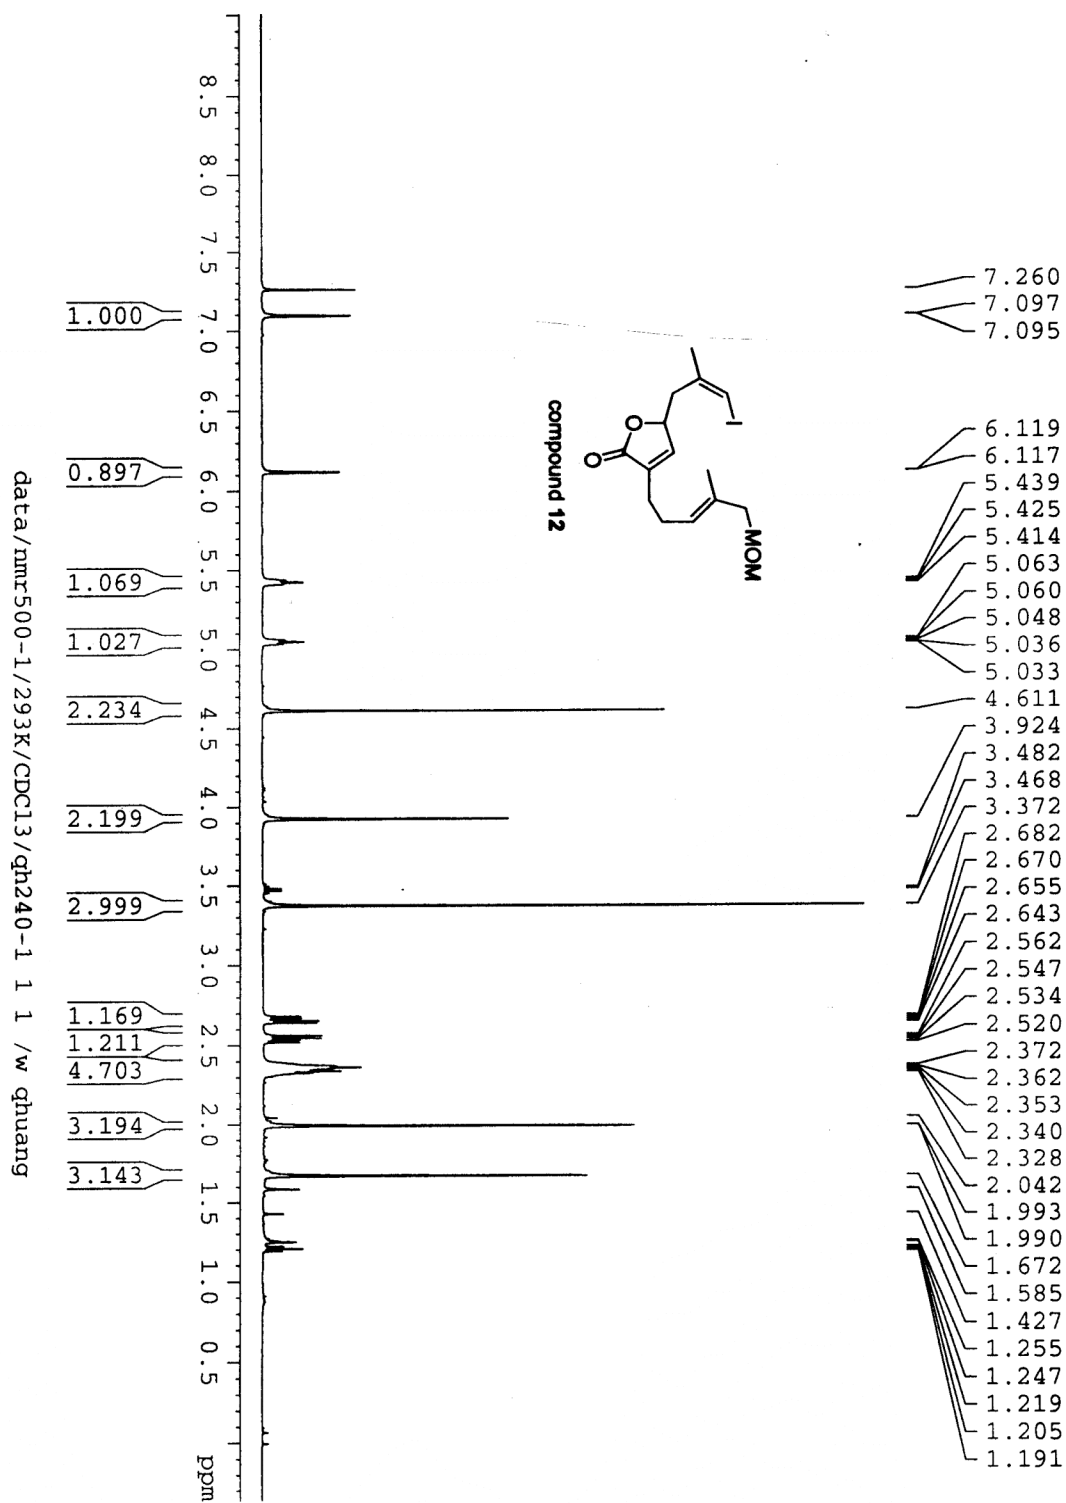

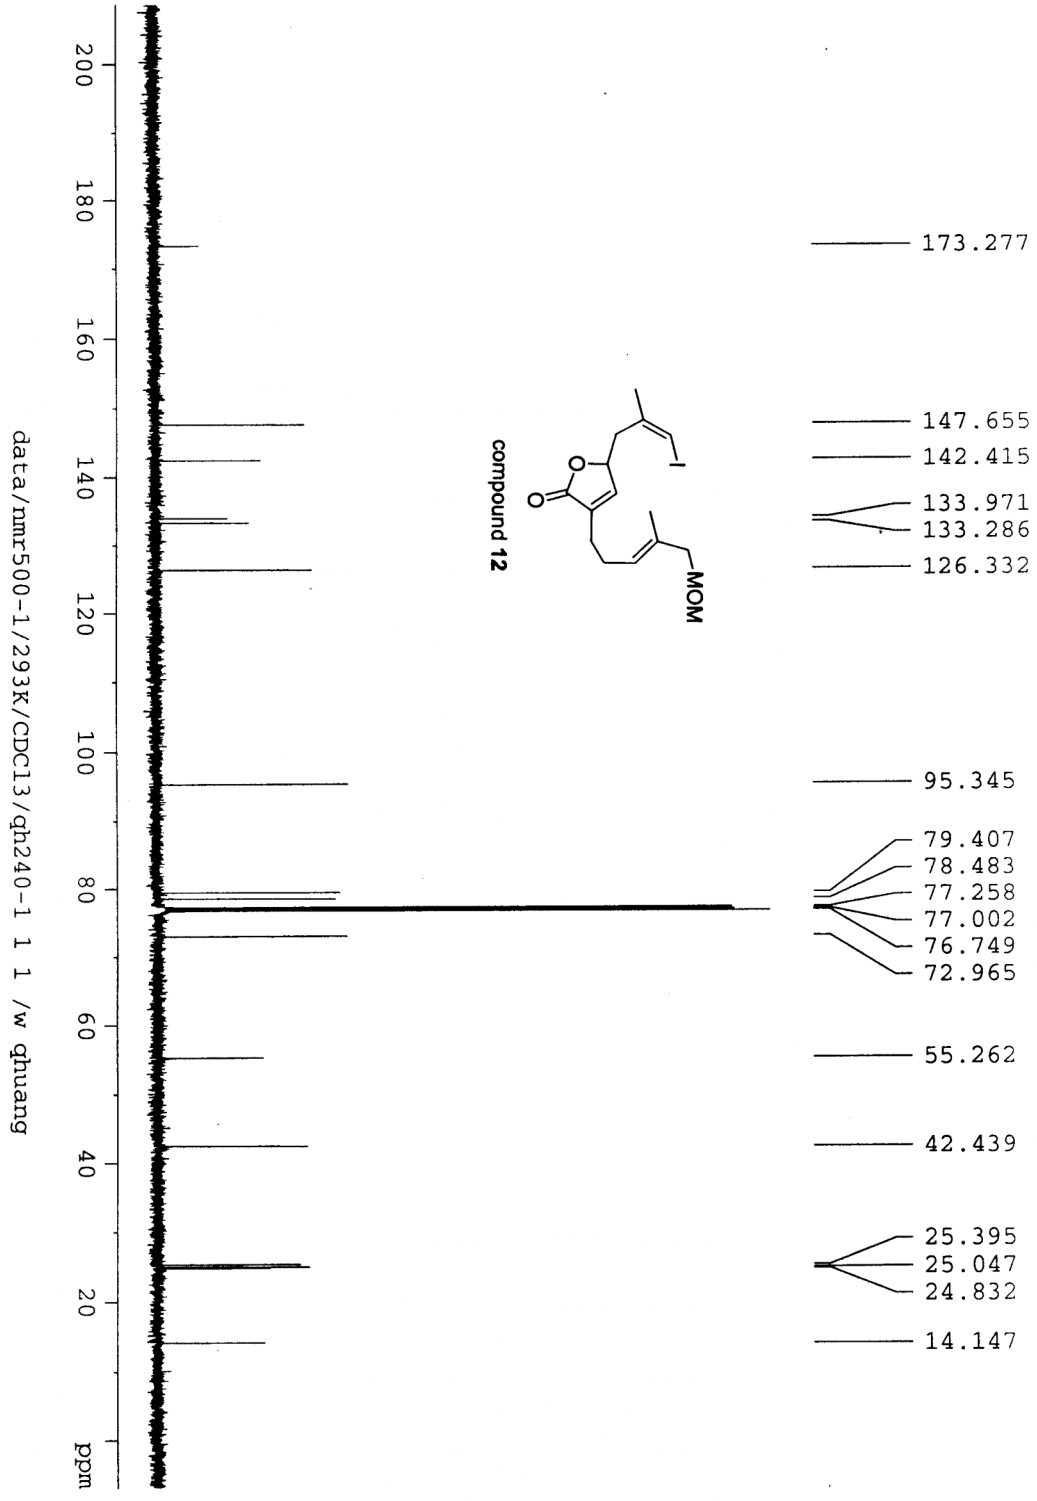

data/nmr400-1/293K/CDCl3/qh244-3 1 1 /w qhuang

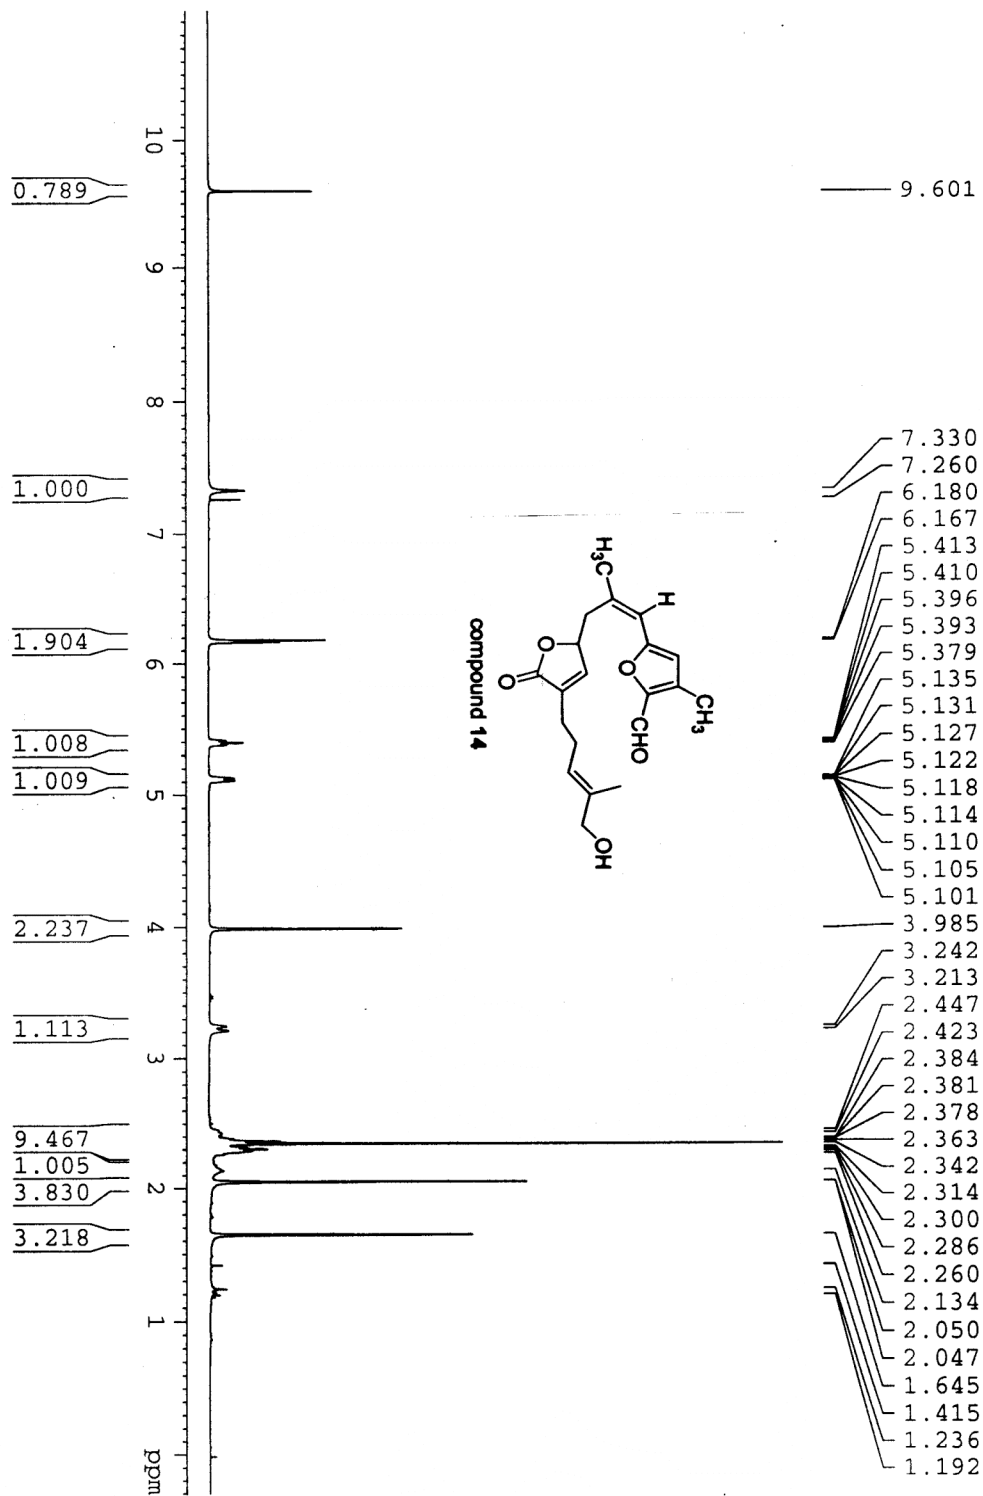

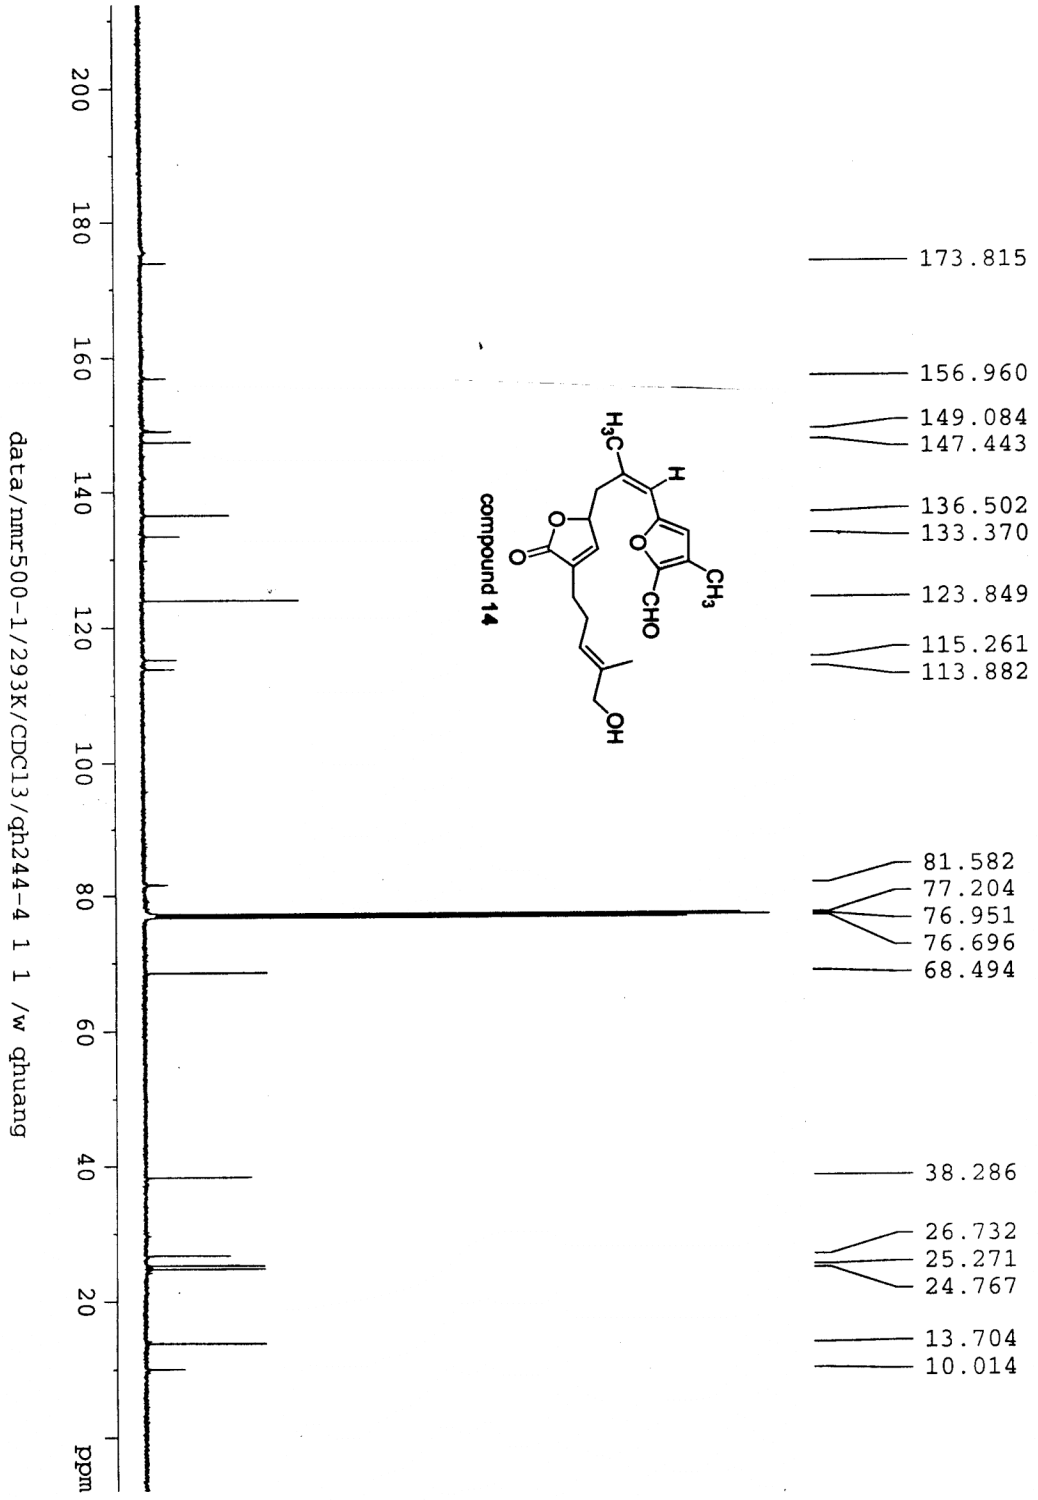

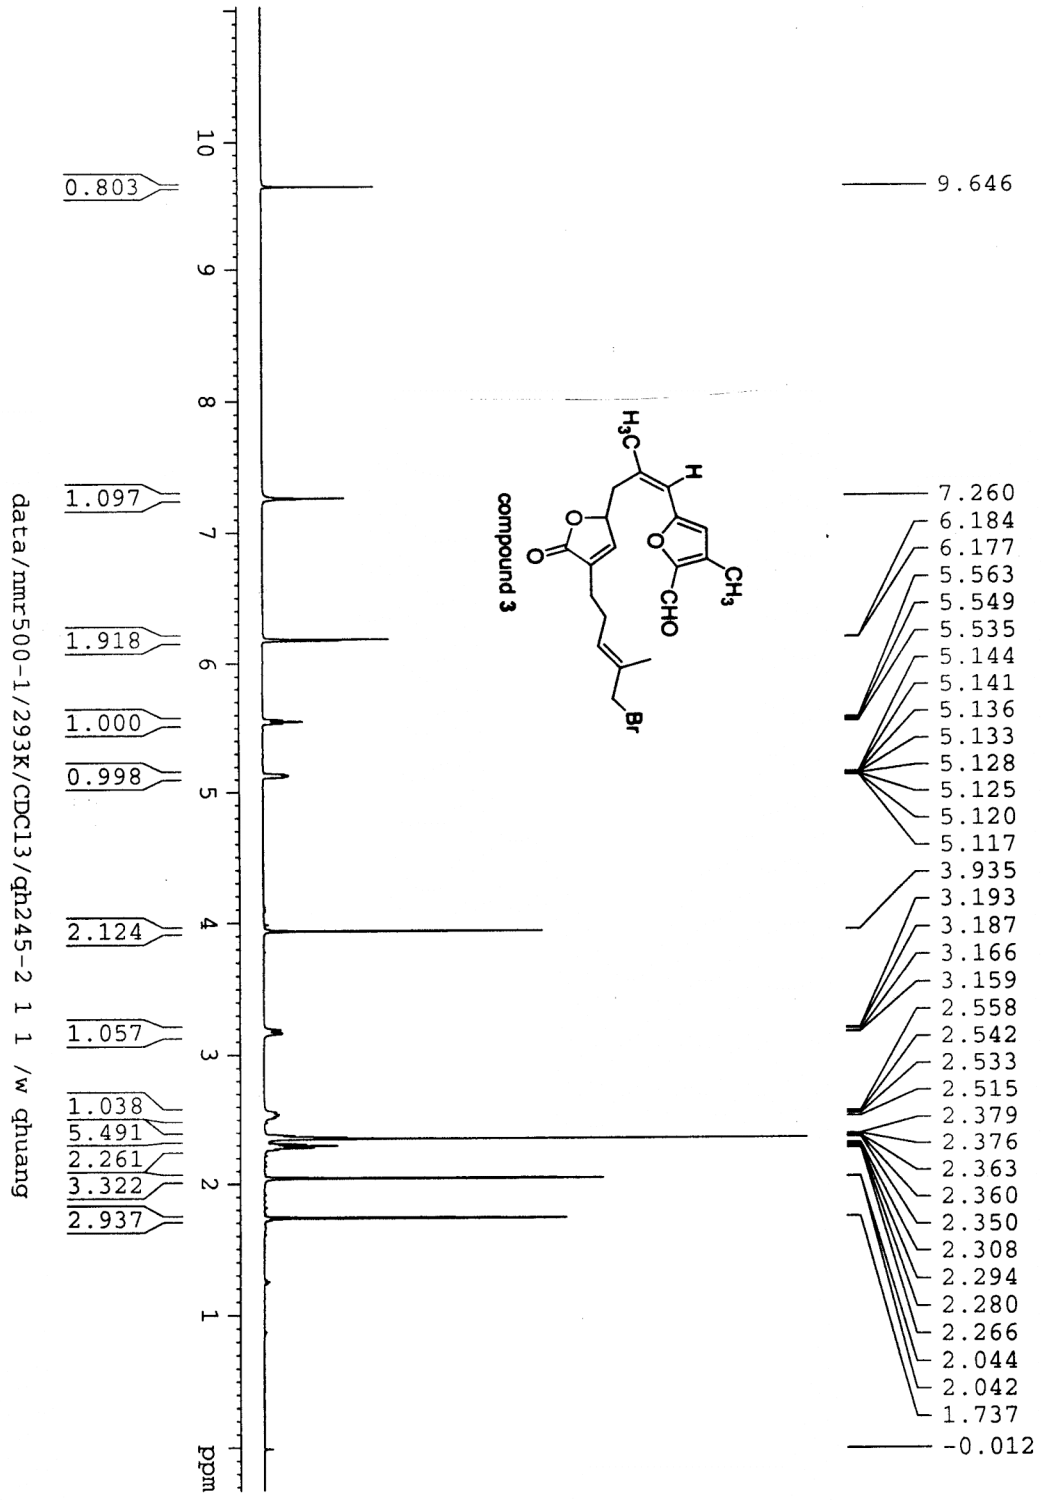

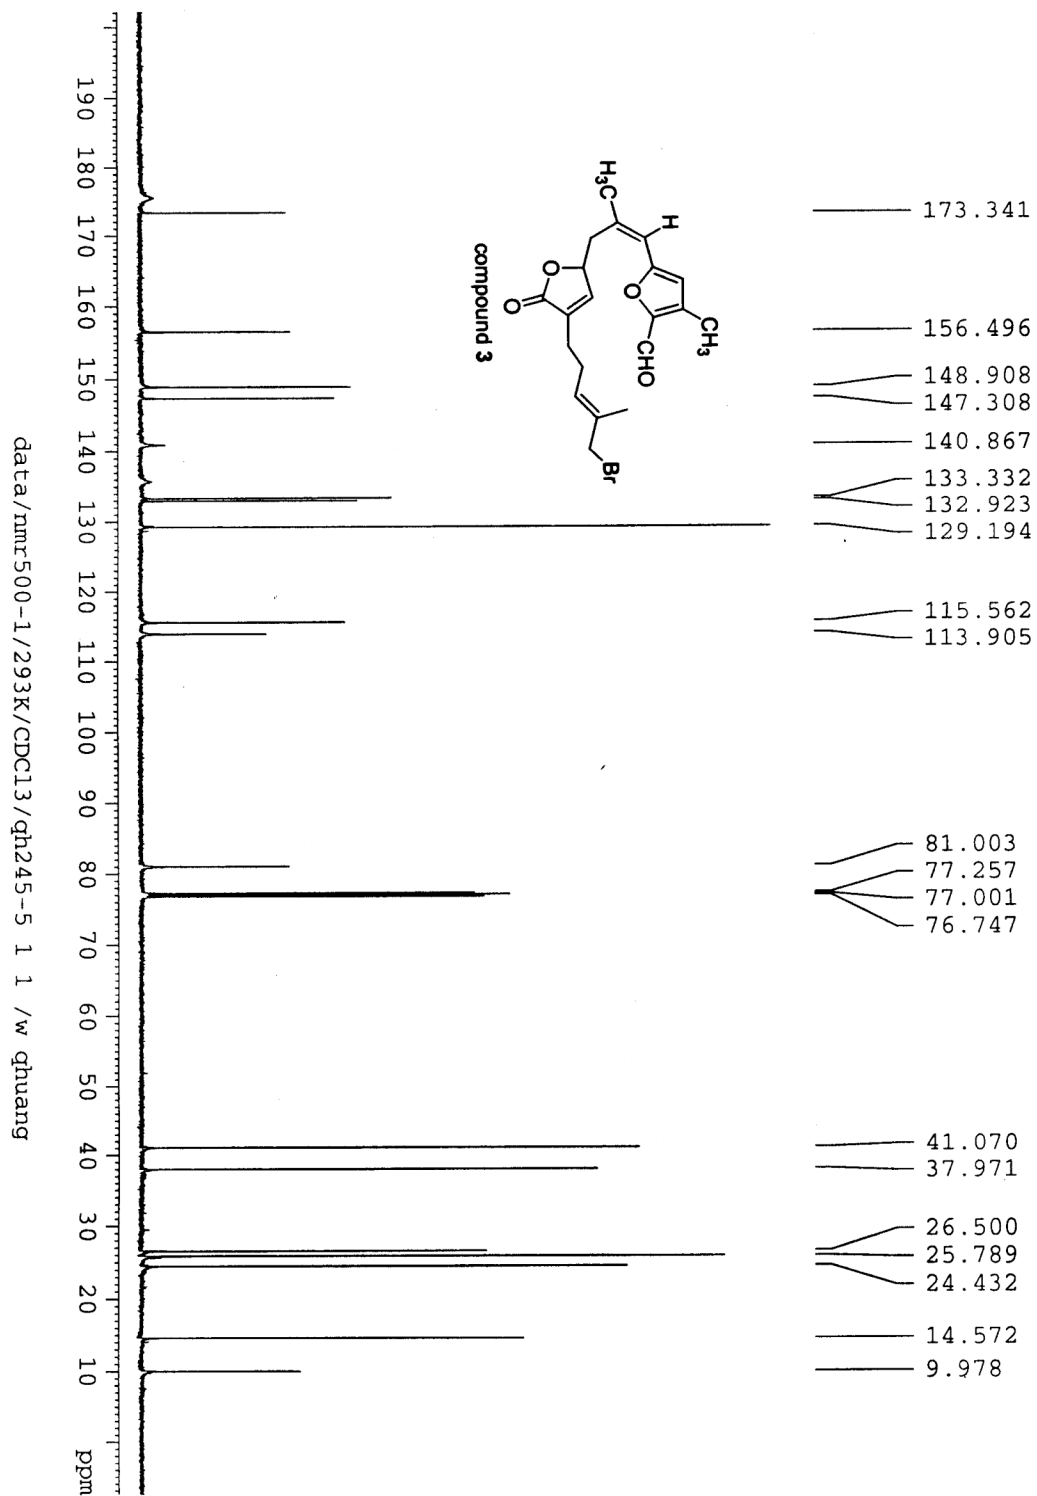

data/rmr400-2/293K/CDCl3/qh3/qh246-1 1 1 /w qhuang

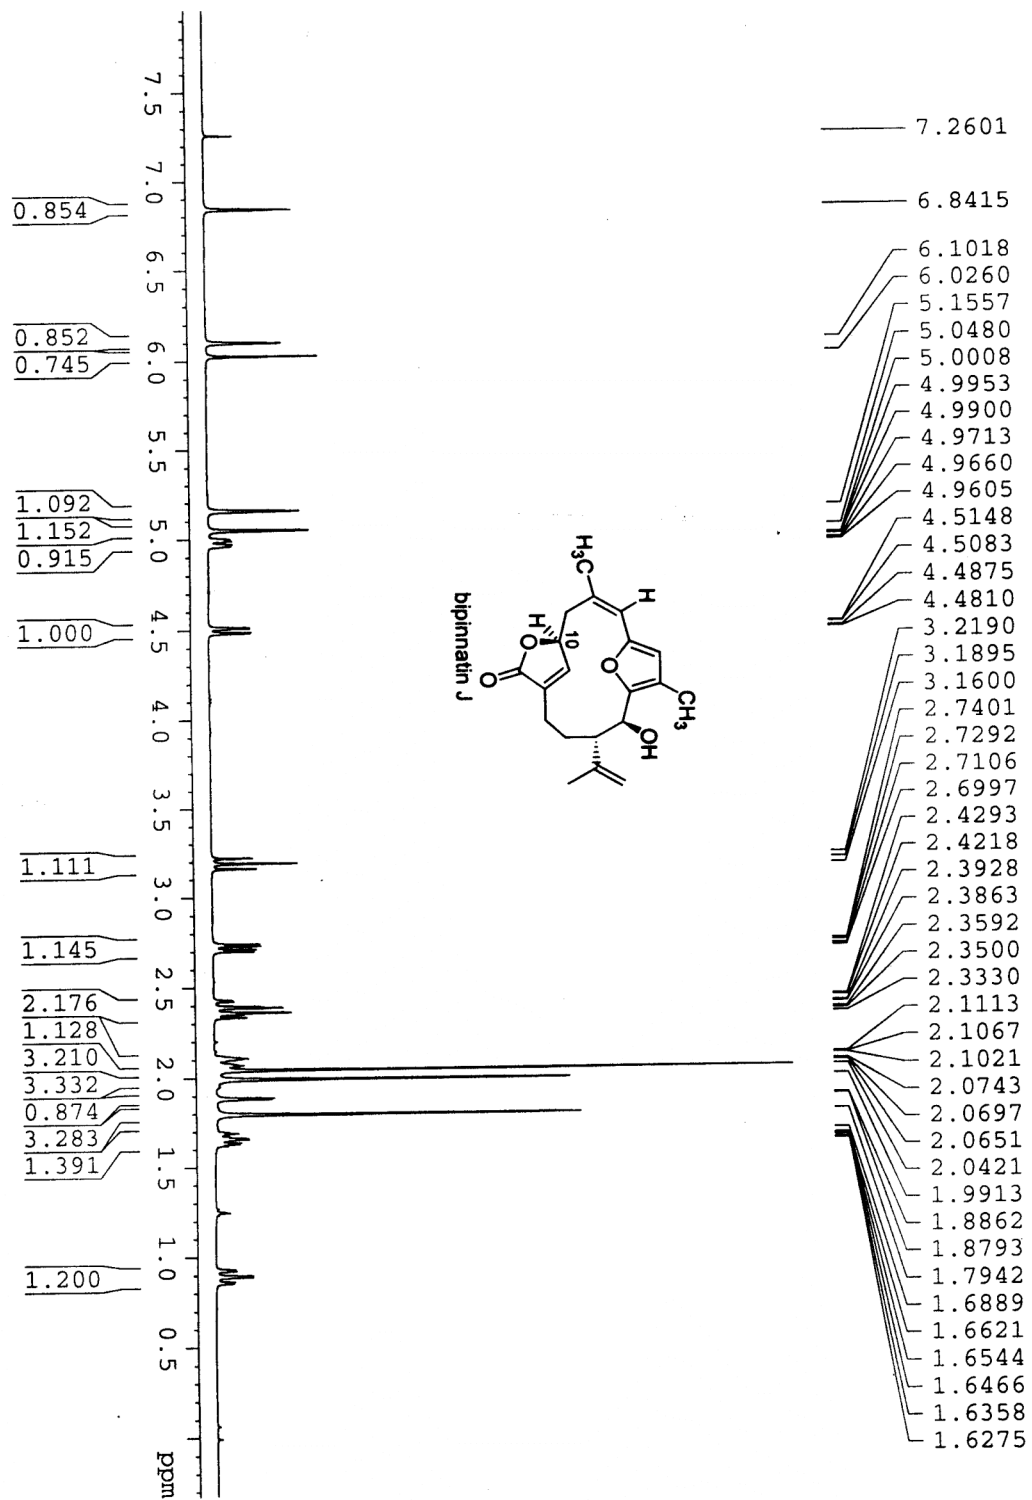



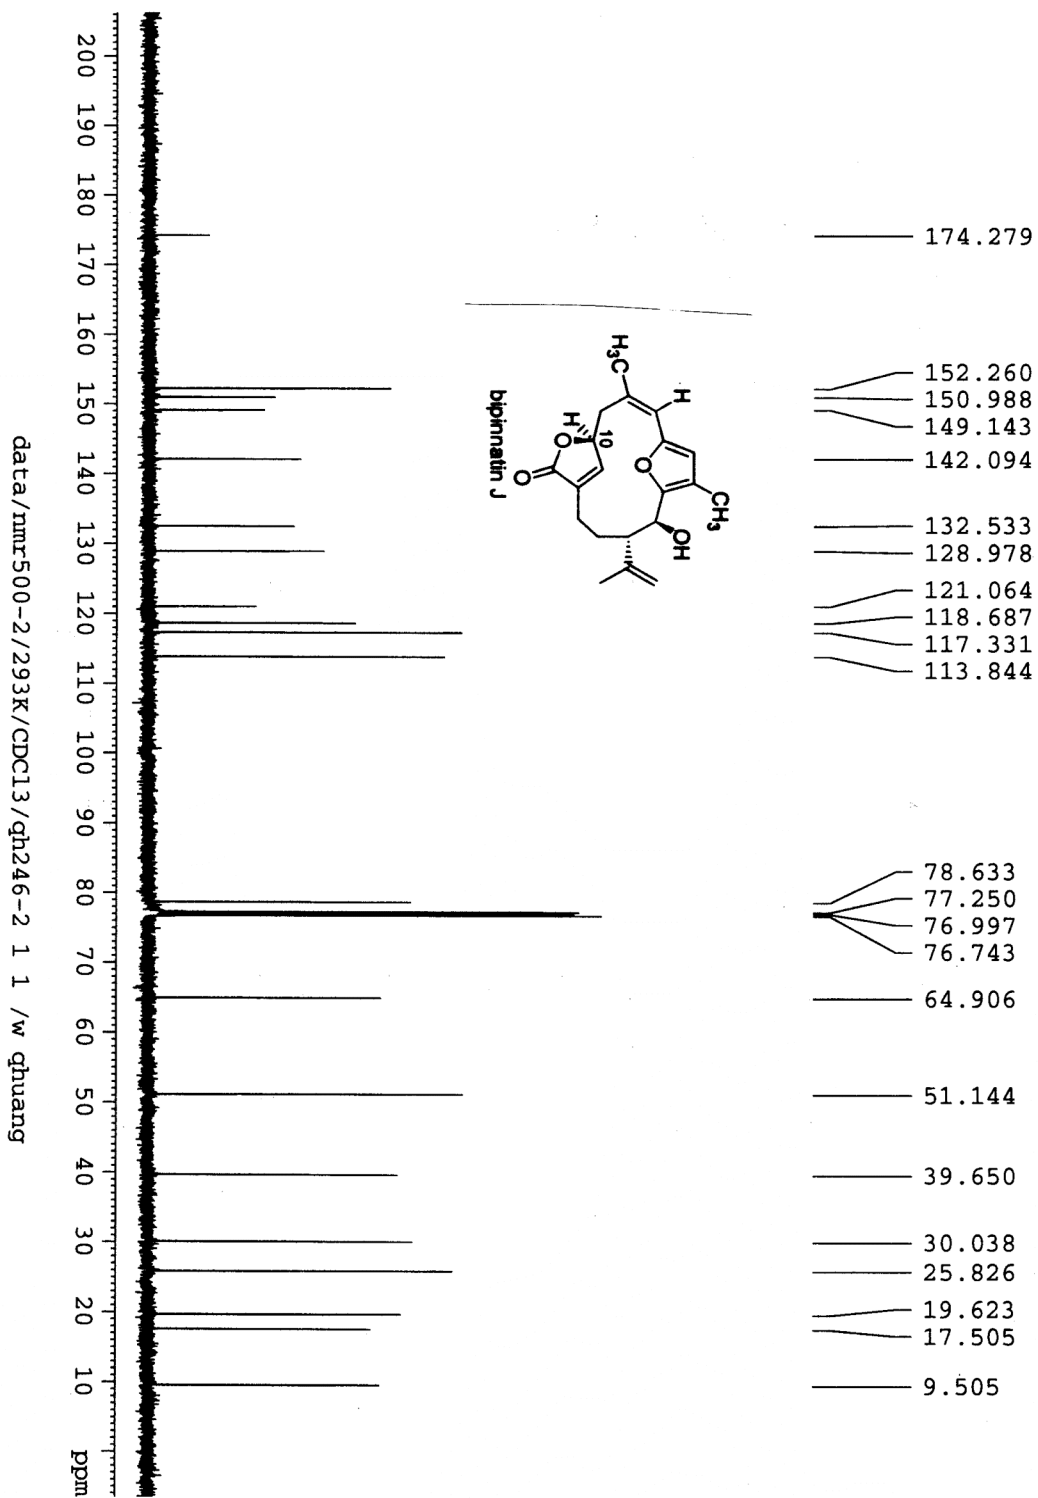

Supplement: NIHMS64052-supplement-1si20051215_07.pdf [file NIHMS64052-supplement-1si20051215_07.pdf]
